# Supplementary material
Source: publisher figshare collection journal article supplement (https://future-science-group.figshare.com/ndownloader/files/28379820)
Supplement: Supplementary file 1 [file 28379820]

**
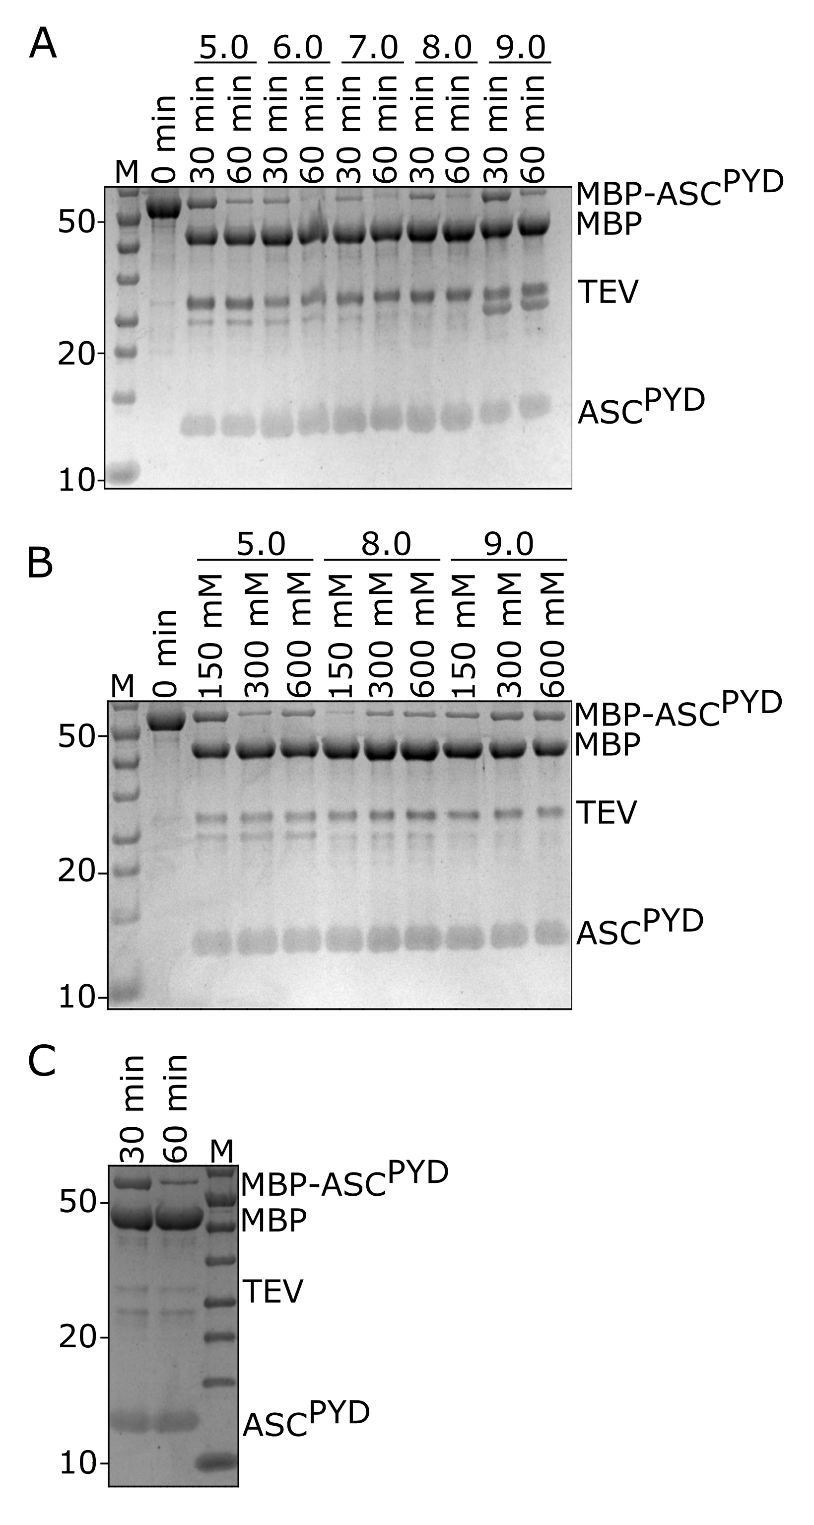
**

**Supplementary Figure 1: TEV-Cleavage of MBP-ASCPYD.** (A) Proteolysis of 10 µM MBP-ASCPYD with 2 µM TEV protease in buffers with 150 mM KCl and different pH values. (B) Proteolysis of 30 µM MBP-ASCPYD with 2 µM TEV protease in buffers with different pHs and different KCl concentrations. (C) Proteolysis of 200 µM MBP-ASCPYD with 2 µM TEV protease under standard conditions. The samples for B and C were diluted before applying to the gel to avoid overloading.

**
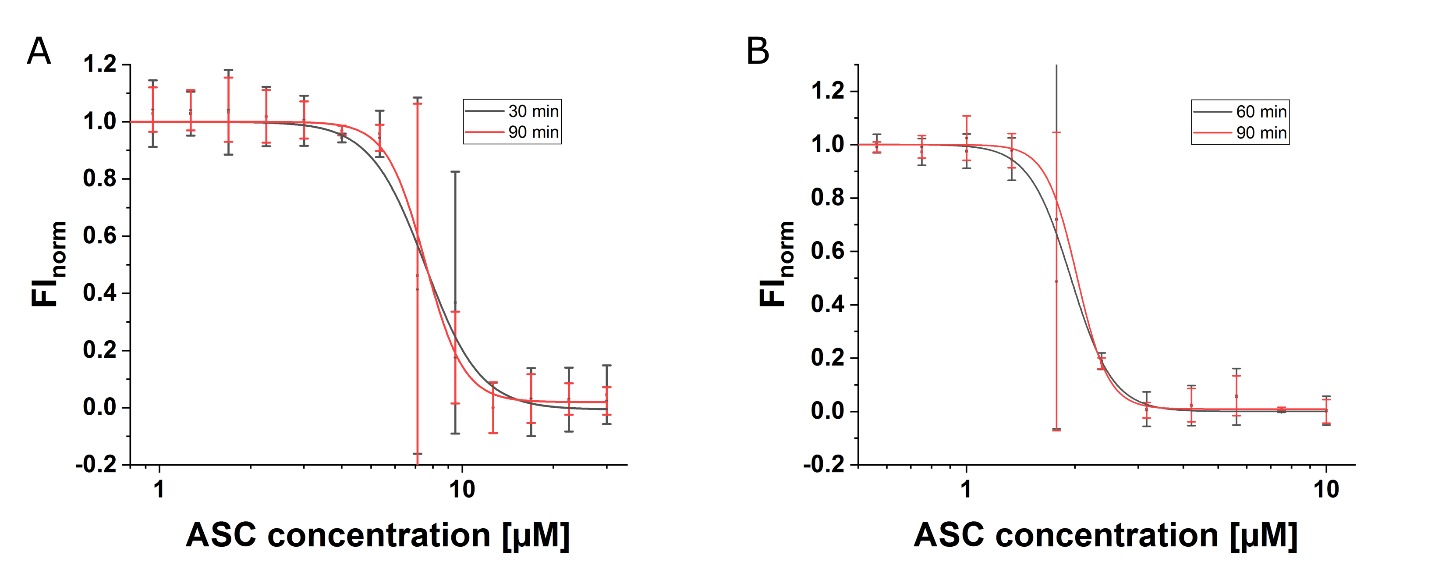
**

**Supplementary Figure 2: Detection of the polymerization of ASCPYD by MST at different time points:** (A): ASCPYD polymerization in solution with 600 mM KCl and a pH of 8.0 after an incubation time of 30 or 90 minutes at 37°C. (B): ASCPYD polymerization in solution with 150 mM KCl and a pH of 5.0 after an incubation time of 60 or 90 minutes at 37°C. Each experiment was performed twice.
